# Supplementary material for: 2,2′-Bis(3-hydroxy-1,4-naphthoquinone)/CMK-3 nanocomposite as cathode material for lithium-ion batteries
Source: Royal Society of Chemistry journal article supplement (doi:10.1039/c3qi00076a), 2014-01-01
Supplement: c3qi00076a.pdf [file c3qi00076a.pdf]

# Electronic Supplementary Information (ESI)

## **2,2'-bis(3-hydroxy-1,4-naphthoquinone)/CMK-3 nanocomposite as cathode material for lithium-ion batteries**

**Hao Li, Wenchao Duan, Qing Zhao, Fangyi Cheng, Jing Liang and Jun Chen\***

Key Laboratory of Advanced Energy Materials Chemistry (Ministry of Education),  
College of Chemistry, Collaborative Innovation Center of Chemical Science and  
Engineering,, Nankai University, Tianjin, 300071, P. R. China  
*Fax:* +86-22-23509571; *Tel:* +86-22-23506808; *E-mail:* chenabc@nankai.edu.cn

### **Contents**

- 1. Scheme S1 synthetic route of H<sub>2</sub>bhnq and characterization.**
- 2. Figure S1 FT-IR spectrum of H<sub>2</sub>bhnq.**
- 3. Figure S2 <sup>1</sup>H and <sup>13</sup>C NMR spectrums of H<sub>2</sub>bhnq.**
- 4. Figure S3 TG-DSC curves of H<sub>2</sub>bhnq.**
- 5. Figure S4 SEM images of H<sub>2</sub>bhnq/CMK-3 composites with different contents of H<sub>2</sub>bhnq.**
- 6. Figure S5 SEM images of 50-H<sub>2</sub>bhnq/CMK-3 before and after 50 cycles.**

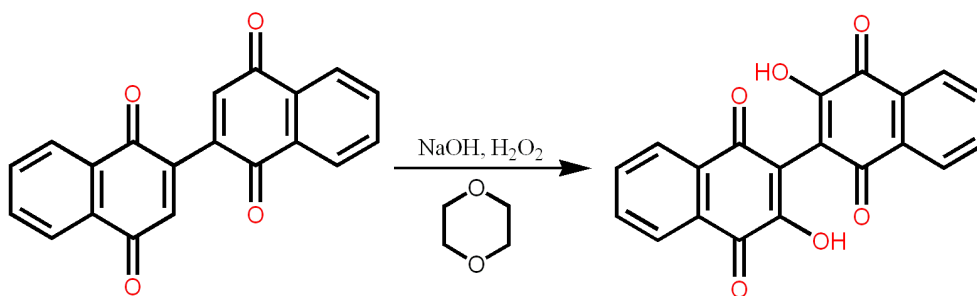

**Scheme. S1** synthetic route of H<sub>2</sub>bhnq

Elemental analysis shows that the synthesized H<sub>2</sub>bhnq consists of 70.24% C and 2.36% H, corresponding to its calculated values: 69.37% C and 2.91% H. IR (KBr) 3349 and 3289 cm<sup>-1</sup> (OH), 1671, 1643, 1631 cm<sup>-1</sup> (C=O); <sup>1</sup>H NMR (DMSO-d<sub>6</sub>) 7.89 (4H, m, 6- 7-, 6'- and 7'-H), 8.01 (2H, dd, 8- and 8'-H), 8.10 (2H, d, 5- and 5'-H) 11.53 (2H, brs, 3- and 3'-OH); <sup>13</sup>C NMR (DMSO-d<sub>6</sub>) 115.4, 125.9, 126.0, 130.1, 131.9, 133.5, 134.9, 156.3, 180.8, 182.2.

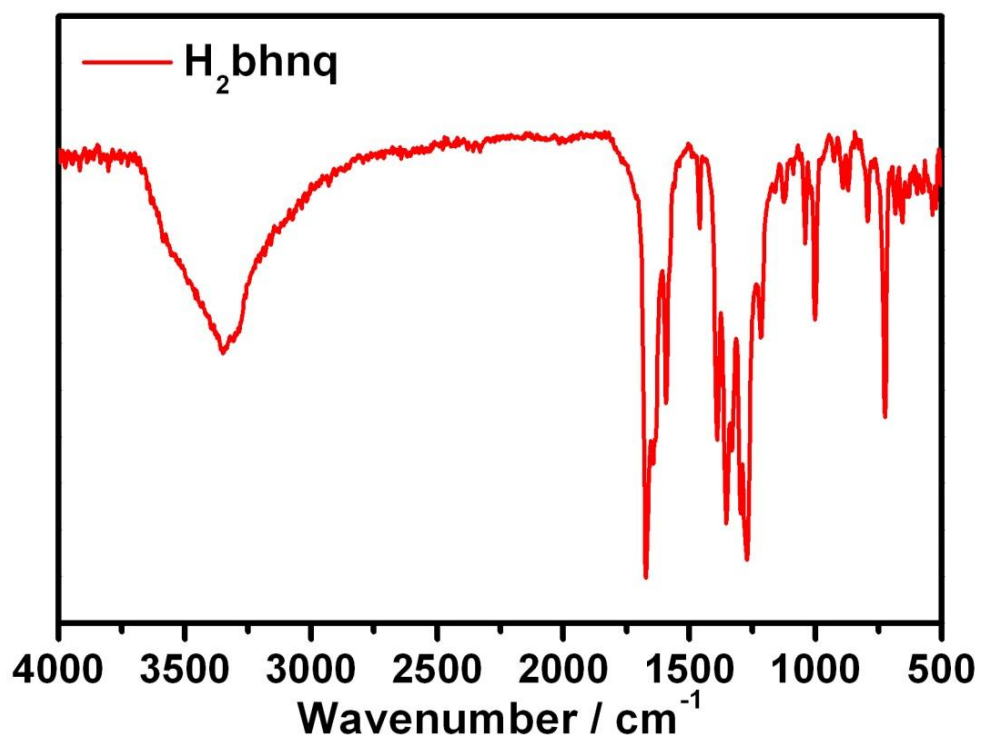

**Fig. S1** The FT-IR spectra of H<sub>2</sub>bhnq (KBr pellets)

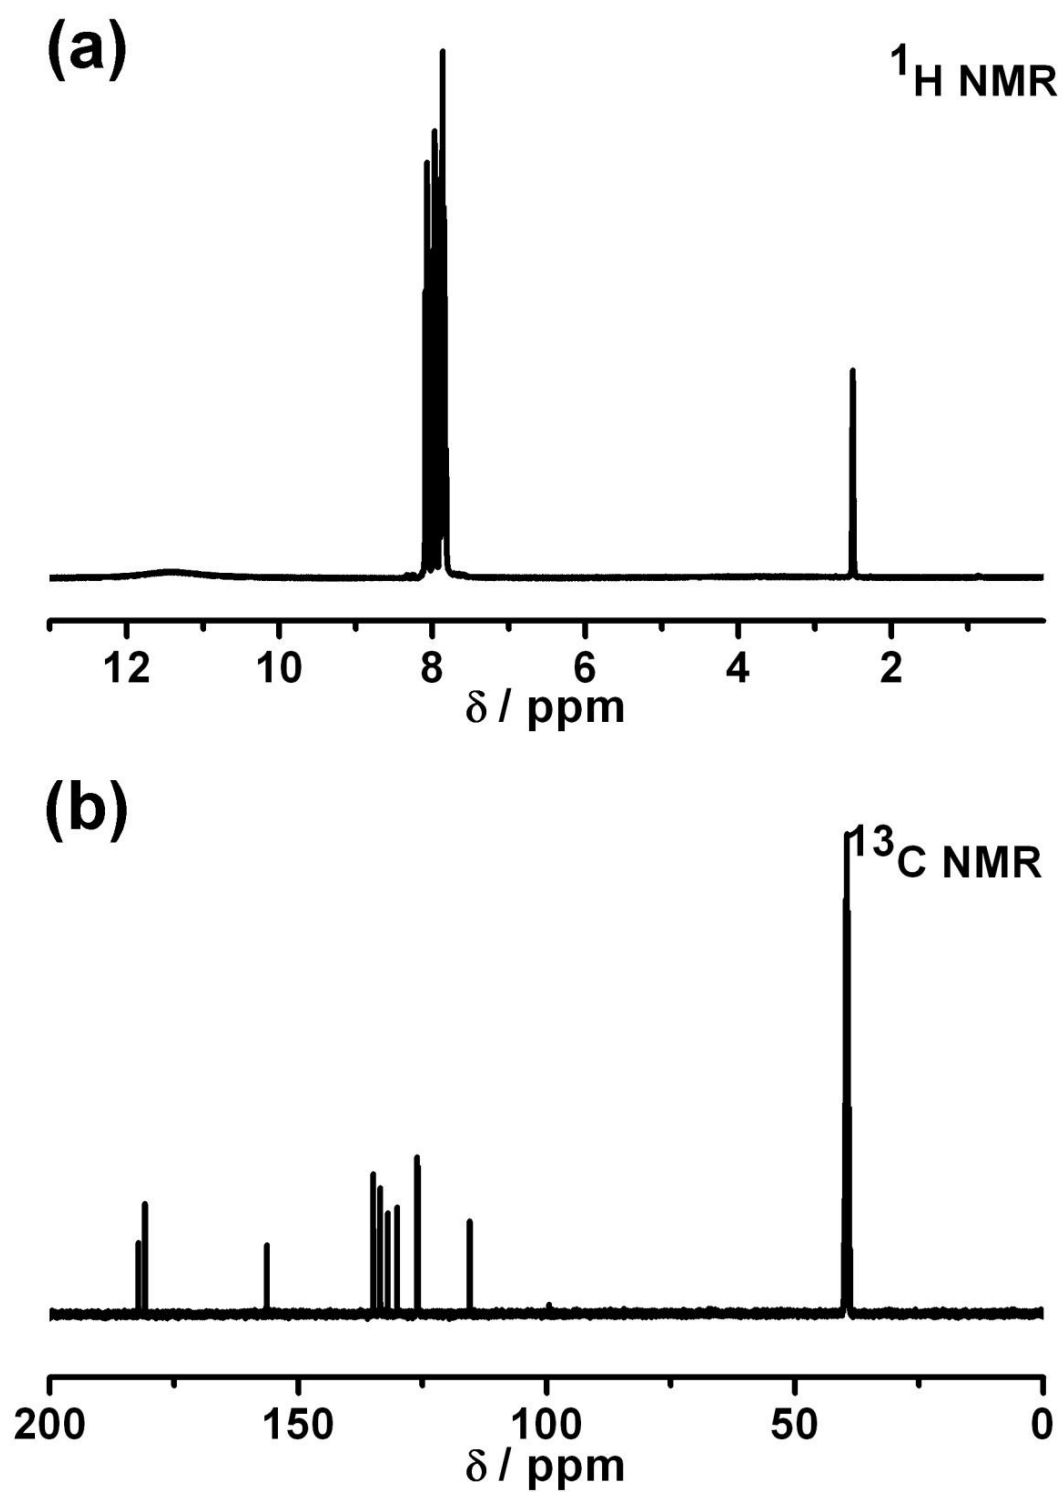

**Fig. S2**  $^1\text{H}$  and  $^{13}\text{C}$  NMR of  $\text{H}_2\text{bhnq}$

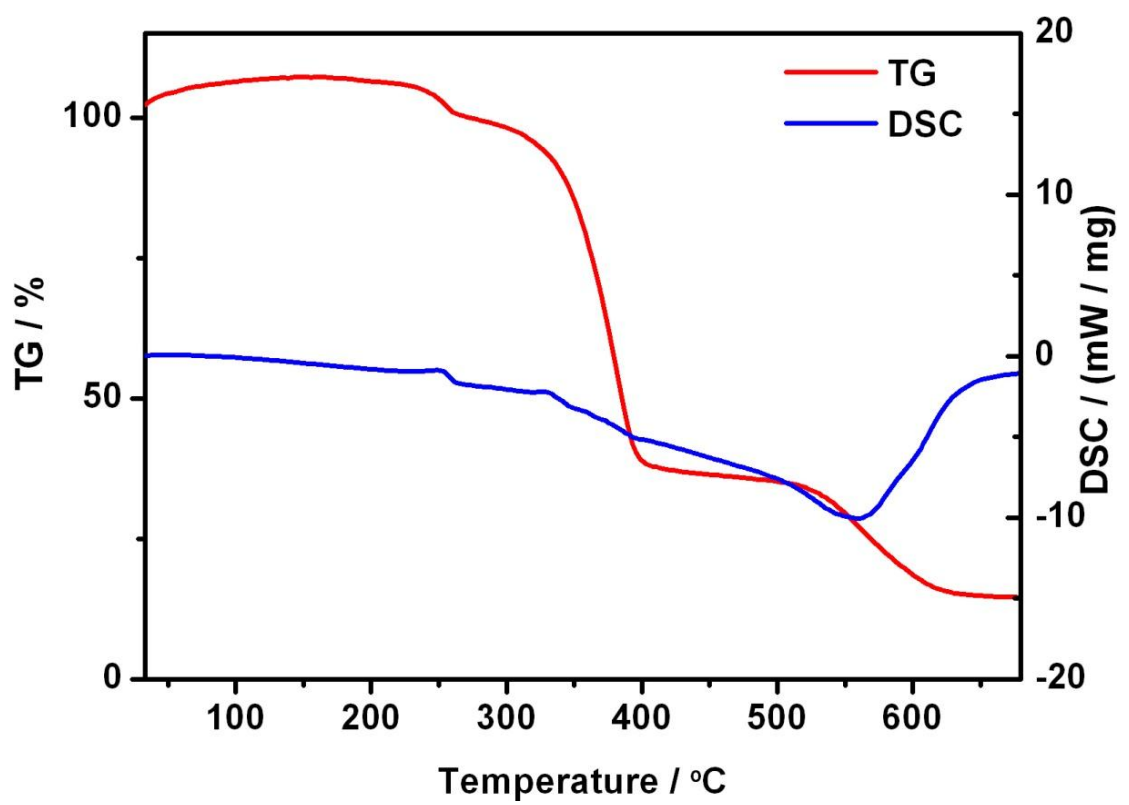

**Fig. S3** TG-DSC curves of H<sub>2</sub>bhnq

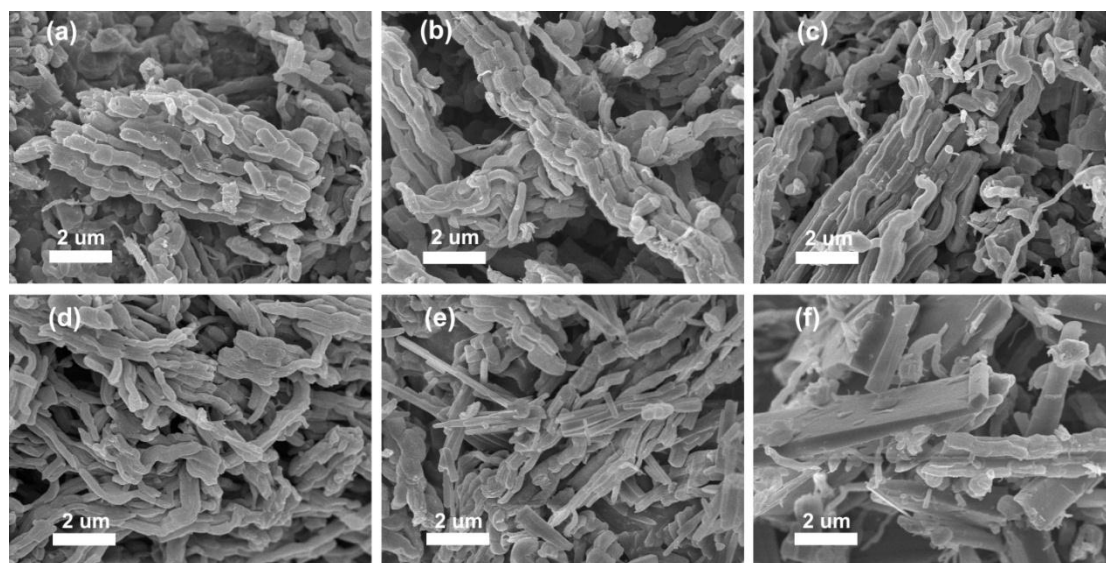

**Fig. S4** SEM images of (a) CMK-3, (b) H<sub>2</sub>bhnq/CMK-3 composite with 25wt.% H<sub>2</sub>bhnq, (c) H<sub>2</sub>bhnq/CMK-3 composite with 33wt.% H<sub>2</sub>bhnq, (d) H<sub>2</sub>bhnq/CMK-3 composite with 50wt.% H<sub>2</sub>bhnq, (e) H<sub>2</sub>bhnq/CMK-3 composite with 66wt.% H<sub>2</sub>bhnq, (f) H<sub>2</sub>bhnq/CMK-3 composite with 75wt.% H<sub>2</sub>bhnq

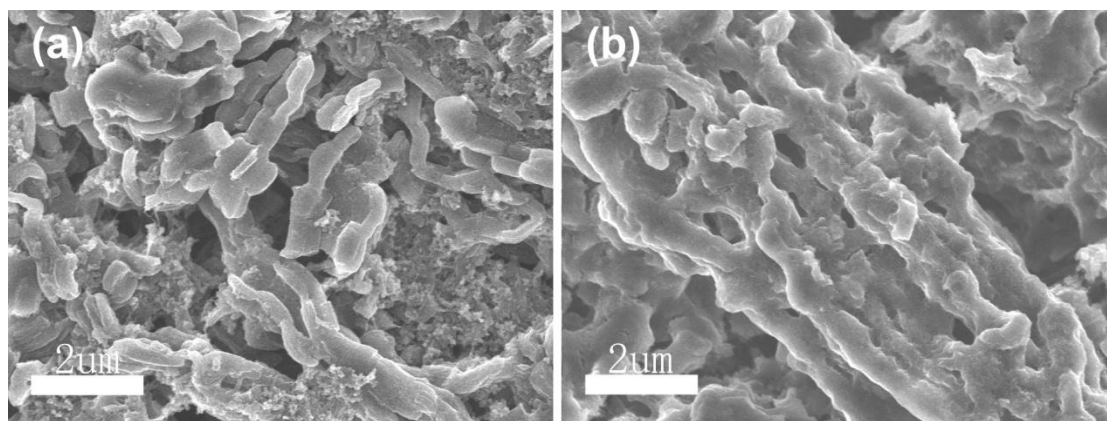

**Fig. S5** SEM images of 50-H<sub>2</sub>bhnq/CMK-3 before and after 50 cycles
